# Supplementary material for: BAP1 and YY1 regulate expression of death receptors in malignant pleural mesothelioma
Source: PubMed Central journal article supplement (PMC8545693; doi:10.1016/j.jbc.2021.101223), 2021-09-29
Supplement: mmc1.pdf [file mmc1.pdf]

## Supporting Information

### **BAP1 and YY1 regulate expression of death receptors in malignant pleural mesothelioma**

Yuki Ishii, Krishna K. Kolluri, Adam Pennycuick, Xidan Zhang, Ersilia Nigro, Doraid Alrifai, Elaine Borg, Mary Falzon, Khalid Shah, Neelam Kumar, Sam M. Janes

- Figure S1:** DR4 and DR5 expression is inversely correlated with nuclear BAP1 expression in MPM TMA
- Figure S2:** Expression levels of DR4 and DR5 are inversely correlated with BAP1 expression in patients with MPM tumours
- Figure S3:** Expression of proteins involved in TRAIL-induced signalling pathways in a panel of MPM cell lines
- Figure S4:** Loss of nuclear BAP1 expression correlates with increased DR4 and DR5 expression and increased rTRAIL sensitivity in early passage MPM cells
- Figure S5:** rTRAIL-resistance in BAP1-expressing cells is not due to the induction of anti-apoptotic proteins by rTRAIL treatment.
- Figure S6:** BAP1 knockdown increases TRAIL sensitivity in cancer cells
- Figure S7:** BAP1 knockdown does not increase death receptors expression and TRAIL sensitivity in normal cells
- Figure S8:** BAP1 negatively regulates expression of DR4 and DR5 leading to TRAIL resistance in H28 MPM cells
- Figure S9:** A list of transcription factors that potentially bind to DR4 and/or DR5 promoters
- Figure S10:** YY1 knockdown increases death receptors expression and TRAIL sensitivity in BAP1-wild-type-cancer cells
- Figure S11:** YY1 expression is not regulated by BAP1
- Figure S12:** Interaction of YY1 and HCF-1

## Supporting Information Figure S1

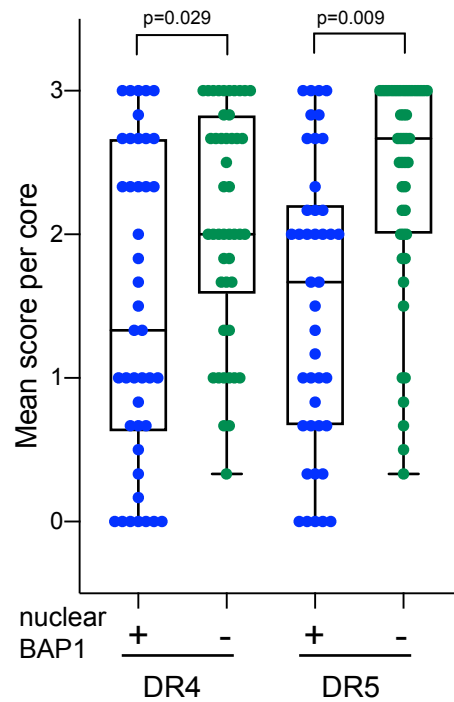

### Figure S1: DR4 and DR5 expression is inversely correlated with nuclear BAP1 expression in MPM TMA

Semi-quantitative analysis of DR4 and DR5 expression in MPM TMA cores with (n=42) and without (n=46) nuclear BAP1 expression. Each dot represents an average score per core. P-values are calculated using a linear mixed models, accounting for the patient ID as a random effect. BAP1 positive samples expressed less DR4 (p=0.029) and DR5 (p=0.0091)

## Supporting Information Figure S2

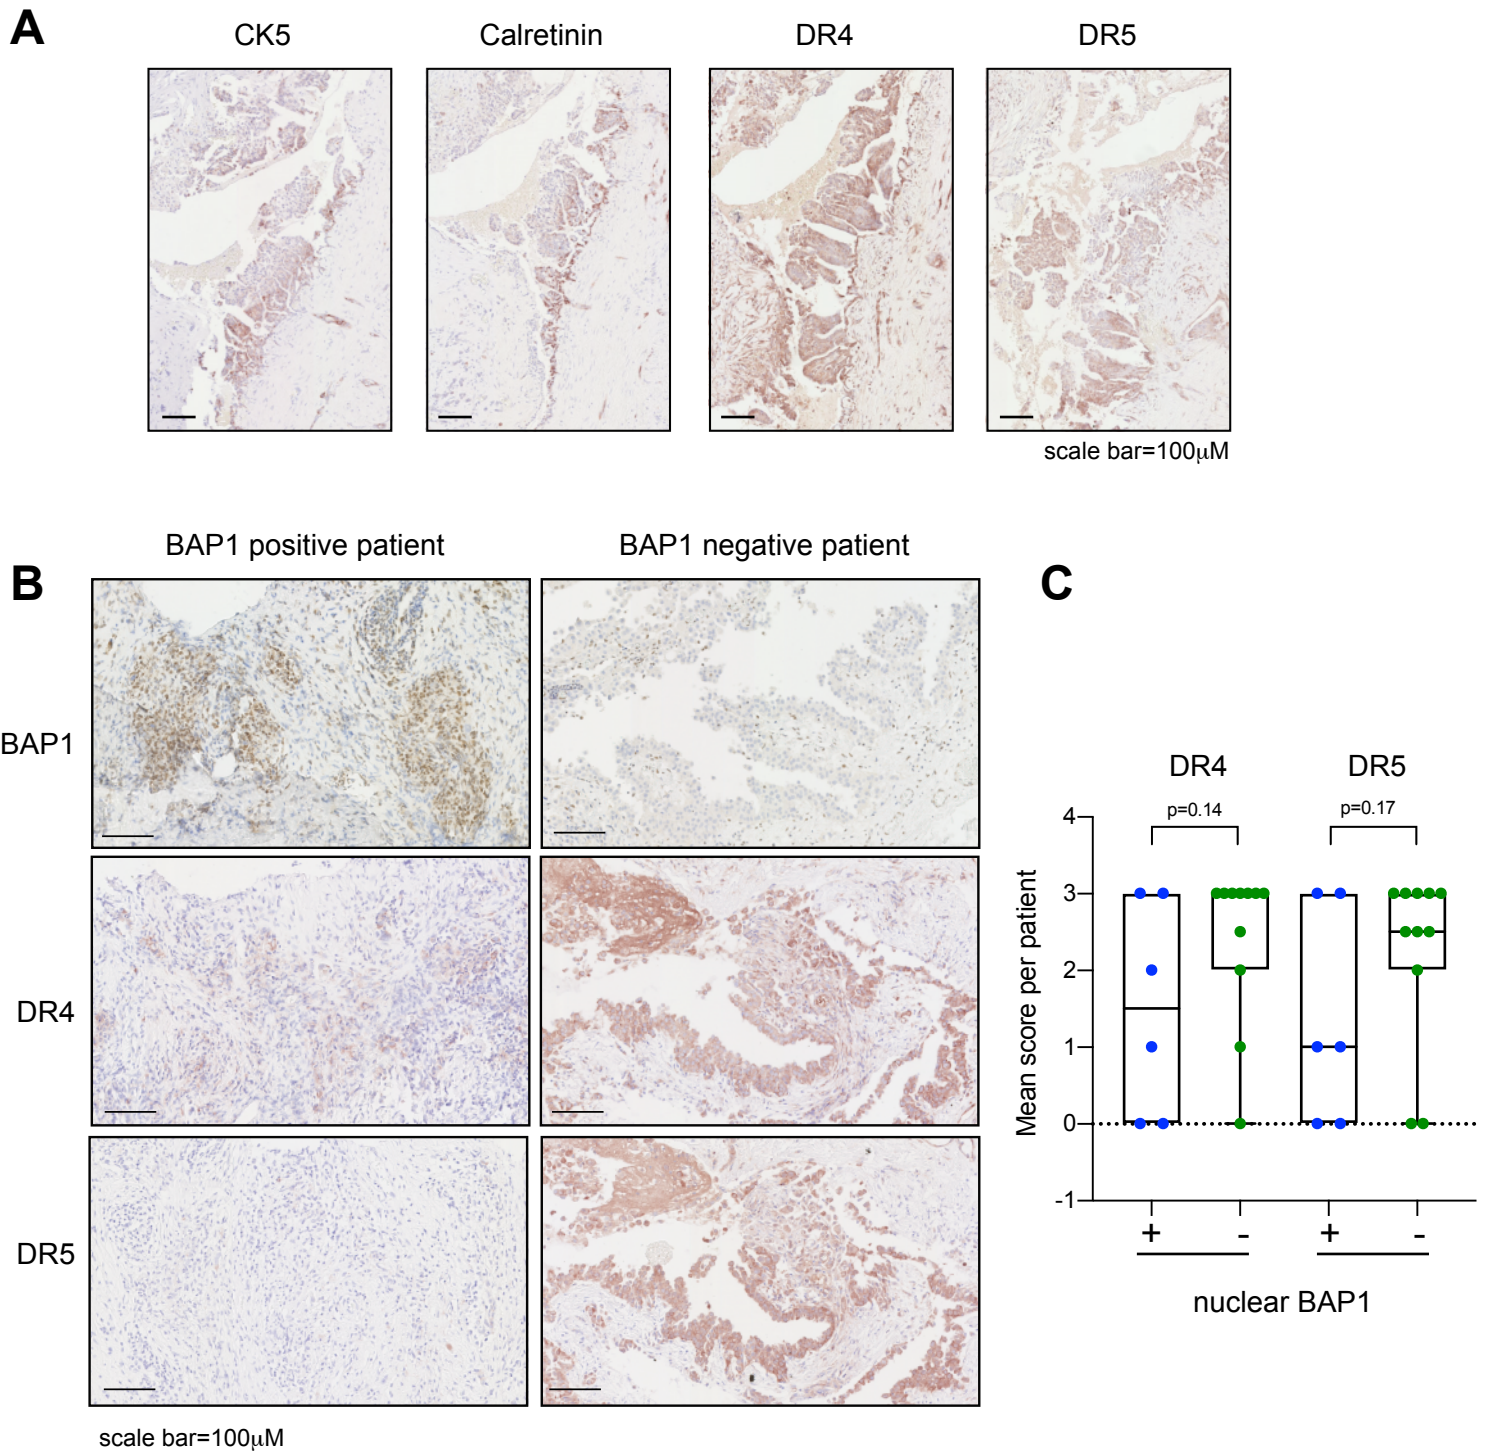

### Figure S2: Expression levels of DR4 and DR5 are inversely correlated with BAP1 expression in patients with MPM tumours

**A**, Immunohistochemical analysis of DR4 and DR5 expression in primary MPM tissue. Two positive markers, cytokeratin 5 (CK5) and calretinin, were used to identify areas of MPM cells. Biopsy samples of 17 MPM patients (6 BAP1 positive, 11 BAP1-negative) from the MS01 clinical trial (NCT00075699) were used and representative images are shown. **B**, Immunohistochemical analysis of DR4, DR5 and BAP1 in primary MPM tissue as described in (A). Representative images show a strong inverse correlation between nuclear BAP1 expression and DR4/DR5 expression. **C**, Semi-quantitative analysis of IHC staining of DR4 and DR5 expression in primary MPM tissue with (+) (n=11) and without (-) (n=6) nuclear BAP1 staining. See method section for a detailed analysis.

## Supporting Information Figure S3

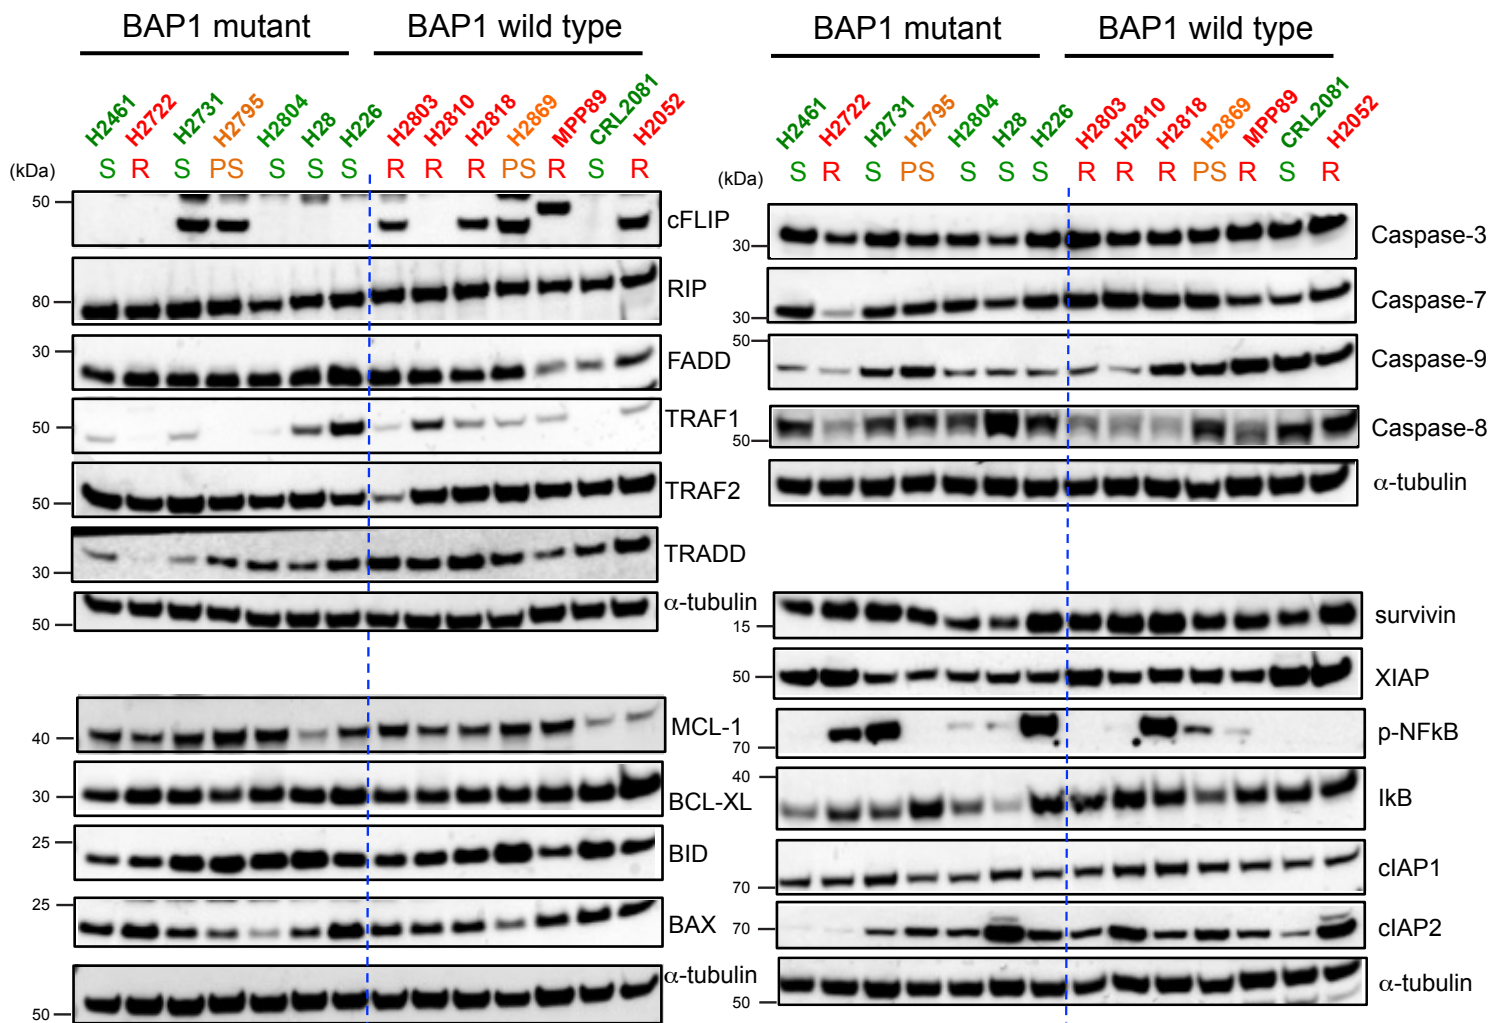

**Figure S3: Expression of proteins involved in TRAIL-induced signalling pathways in a panel of MPM cell lines**

MPM cell lines were divided into two groups (BAP1 mutant and BAP1 wild type) and are coloured according to the sensitivity to rTRAIL (green=sensitive (S); orange=partially sensitive (PS); red=resistant (R)). Proteins involved in TRAIL-induced signalling pathways, including pro- and anti-apoptotic pathways, were determined by immunoblots.

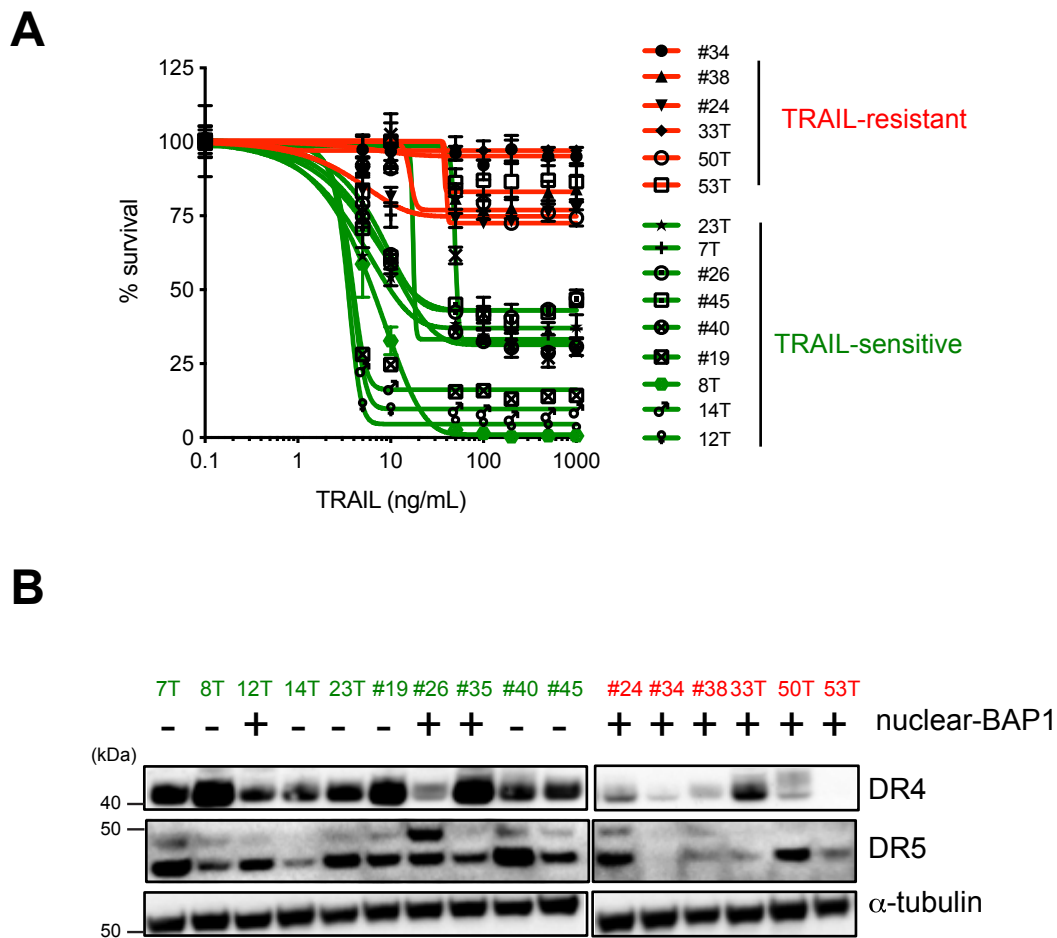

**Figure S4: Loss of nuclear BAP1 expression correlates with increased DR4 and DR5 expression and increased rTRAIL sensitivity in early passage MPM cells**

**A**, Cell viability assay of early passage MPM cells following treatment with a dose range of rTRAIL (0-1000ng/ml) for 72 hours. Cells with  $IC_{50} > 100$ ng/mL are defined as TRAIL-resistant (red); cells with  $IC_{50} < 100$ ng/mL are defined as TRAIL-sensitive (green). **B**, Immunoblots of DR4 and DR5 expression in early passage MPM cells stratified by rTRAIL sensitivity and the presence (+) or absence (-) of nuclear BAP1 expression. Quantitative analysis of this experiment can be found in Fig.1E.

# Supporting Information Figure S5

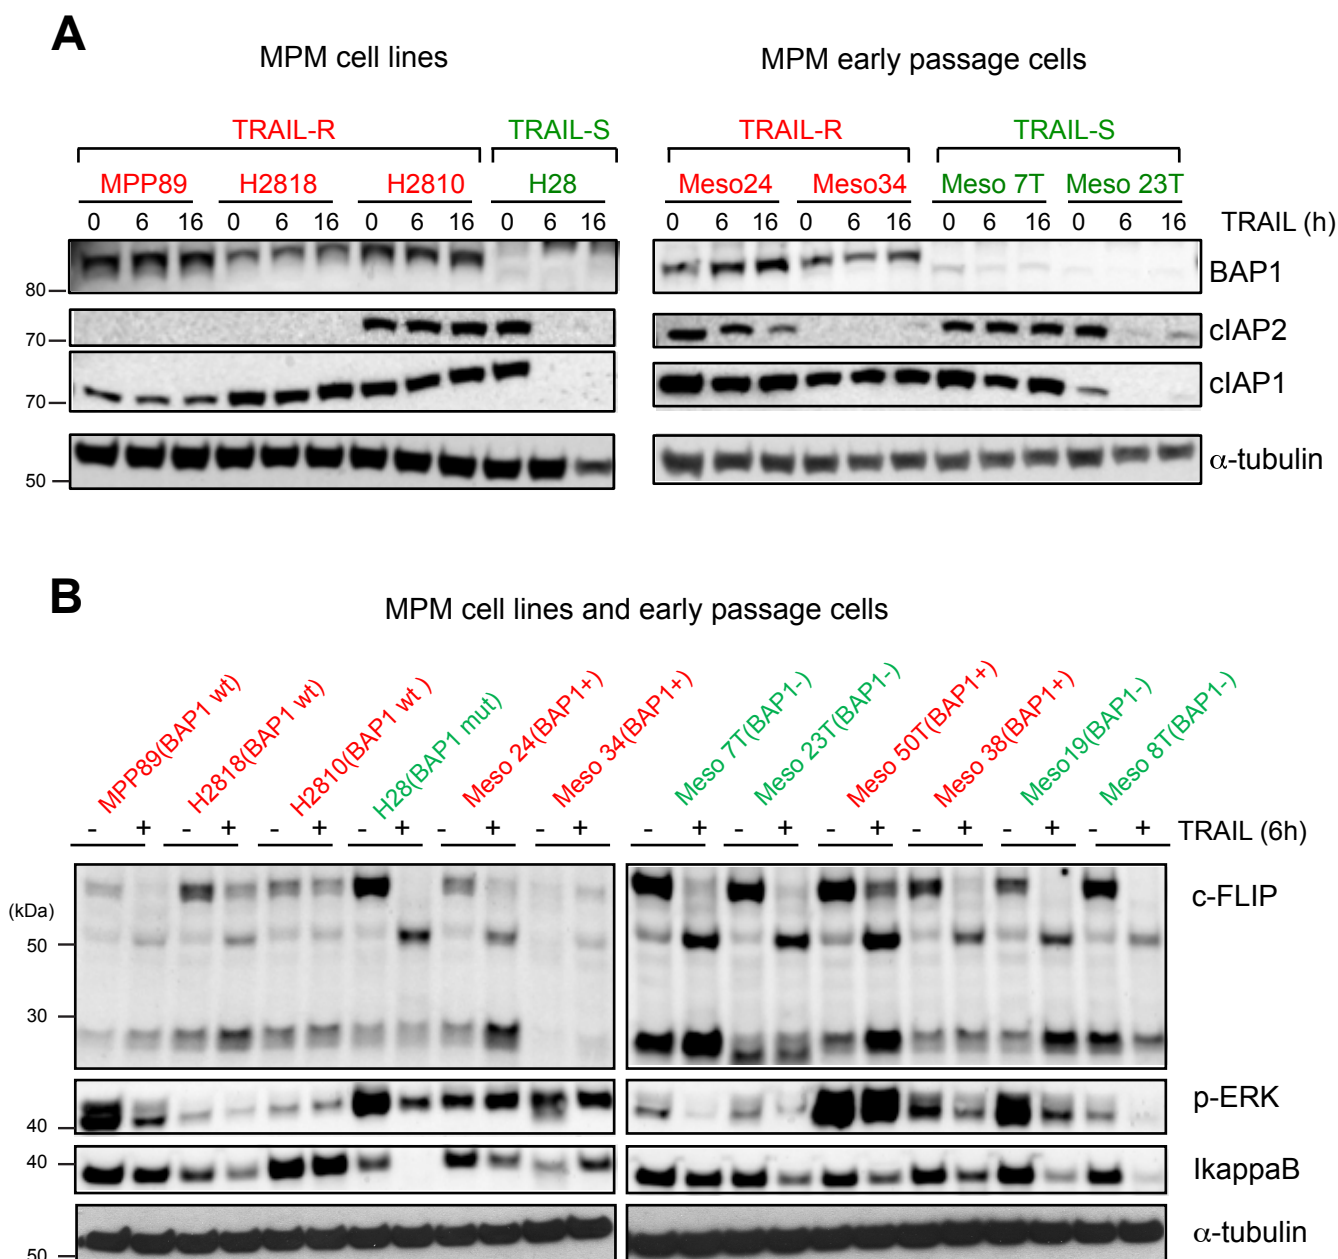

**Figure S5: rTRAIL-resistance in BAP1-expressing cells is not due to the induction of anti-apoptotic proteins by rTRAIL treatment.**

MPM cell lines and human early passage MPM cells were treated with 100ng/ml of rTRAIL for 0, 6 or 16 hours (**A**) or 0, 6 hours (**B**) to determine the expression of inhibitors of apoptosis proteins (cIAP1 and cIAP2), c-FLIP, p-ERK and IκBα by western blot. Sensitivity to rTRAIL treatment is indicated as font colour: green sensitive (S); red resistant (R). BAP1's mutational status (wild type; wt or mutant; mut) or nuclear BAP1 expression (BAP1+ or BAP1-), which reflects the mutational status, is indicated (**B**).

## Supporting Information Figure S6

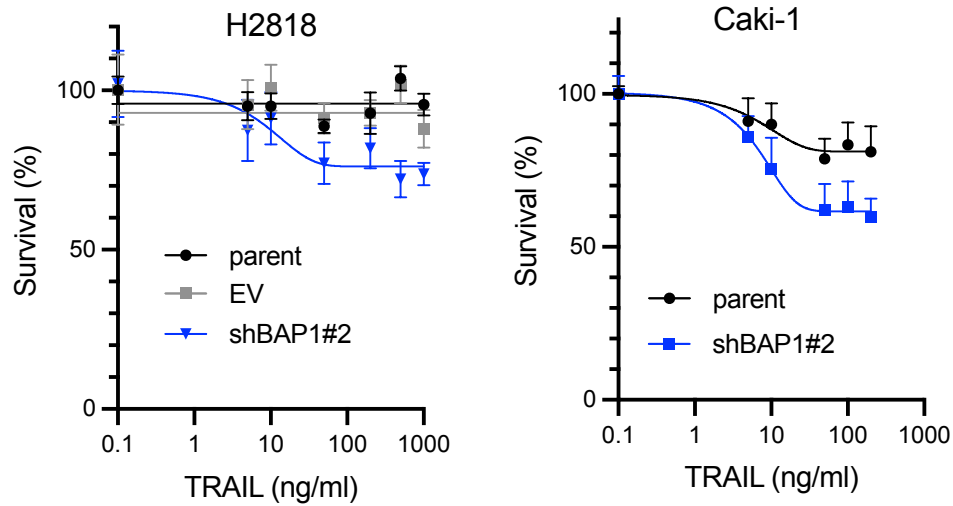

**Figure S6: BAP1 knockdown increases TRAIL sensitivity in cancer cells**

Cell viability assay in BAP1-wild-type MPM cells (H2818) and BAP1-wild-type- clear cell renal cell carcinoma (CCRCC) cells (Caki-1) transduced with BAP1 (shBAP1-clone#2) or empty vector (EV) shRNA. The cells were treated with a dose range of rTRAIL (0-1000ng/ml) for 72 hours, relative viability was assessed by MTT assay.

# Supporting Information Figure S7

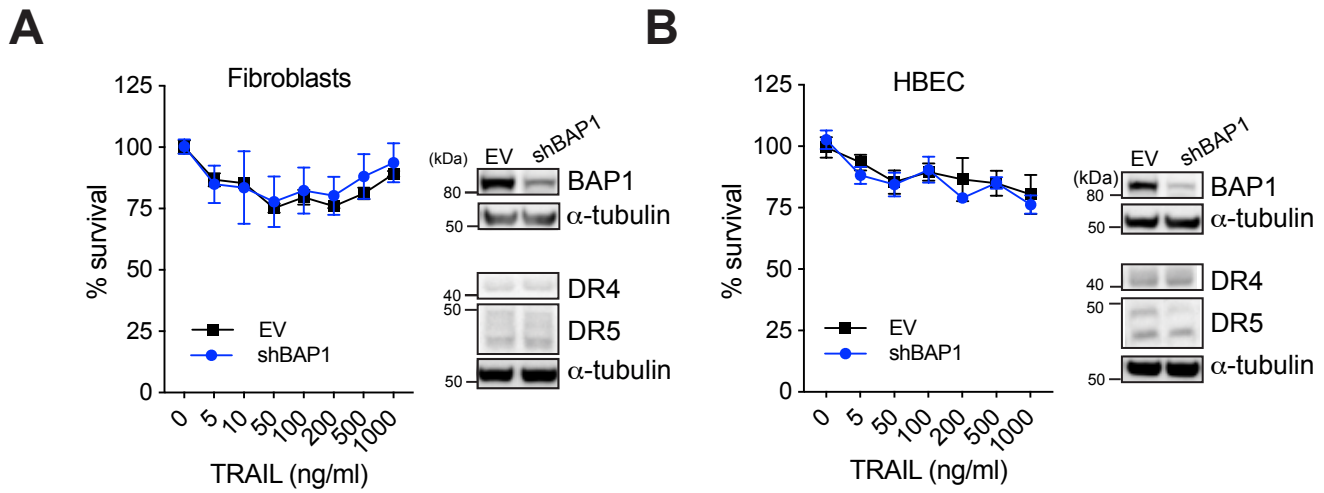

**Figure S7: BAP1 knockdown does not increase death receptors expression and TRAIL sensitivity in normal cells**

**A& B**, Cell viability assay of fibroblasts (**A**) and human bronchial epithelial cells (HBECs) (**B**) transduced with EV or shBAP1 (clone#1) following treatment with a dose range of rTRAIL (0-1000ng/ml) for 72 hours. Immunoblots of BAP1, DR4 and DR5 in these cells are also shown. Error bars represent the standard deviation.



# Supporting Information Figure S8

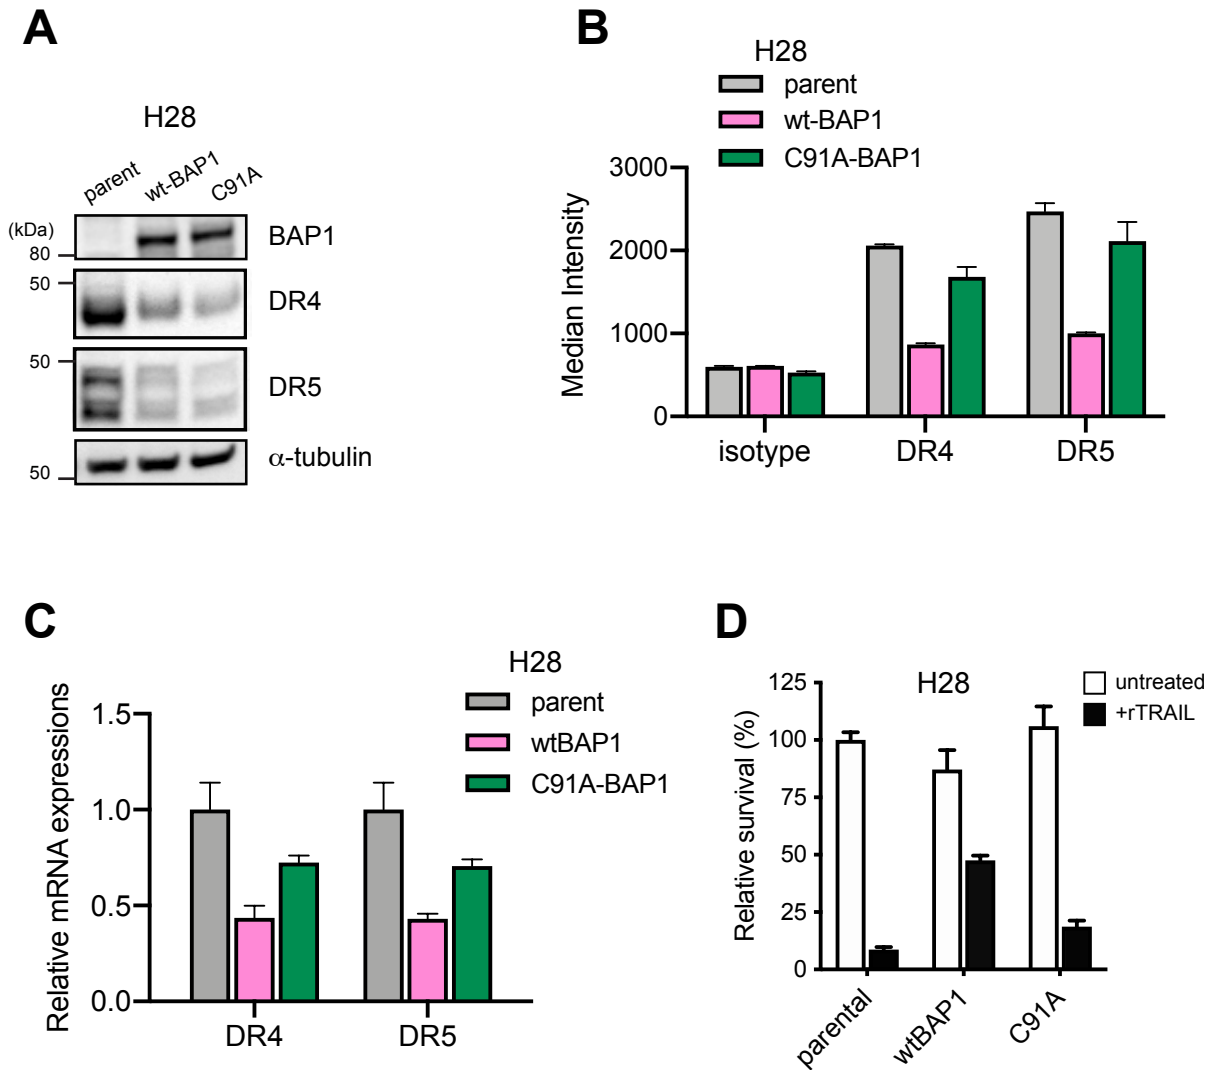

**Figure S8: BAP1 negatively regulates expression of DR4 and DR5 leading to TRAIL resistance in H28 MPM cells**

**A**, Immunoblot of BAP1- null H28 cells transduced with wild-type-BAP1 (wt-BAP1) or catalytically inactive BAP1-mutant (C91A-BAP1). **B**, Flow cytometry analysis of DR4 and DR5 cell surface expression in H28 cells transduced with wt-BAP1 or C91A-BAP1. Data shown are the mean  $\pm$  s.d. performed in triplicates. **C**, Quantitative PCR analysis of DR4 and DR5 mRNA in H28 cells transduced with wt-BAP1 or C91A-BAP1. Data shown are the mean  $\pm$  s.d. performed in triplicates. **D**, The sensitivity to rTRAIL (50ng/mL) is decreased in wt-BAP1-transduced H28 cells. Cell viability was assessed 72 hours later by XTT assay. Data shown are the mean  $\pm$  s.d. (n=6).

## Supporting Information Figure S9

| only DR4 | only DR5 | Both DR4&DR5 |
|----------|----------|--------------|
| NR3C1    | USF2     | YY1          |
| HNF1A    | NF1      | NFKB1        |
| IRF2     | ETS2.1   | TP53         |
| USF2     | NFKB1.1  | FOXA1        |
| RARA     |          | CEBPB        |
| ELF1     |          | NFIC         |
| RXRA.2   |          | TAF6         |
| ARNT     |          | XBP1         |
|          |          | EBF2         |
|          |          | RXRA         |
|          |          | RXRA.1       |
|          |          | NFYA         |
|          |          | E2F1         |
|          |          | ATF3         |
|          |          | ETS2         |
|          |          | ETFB         |
|          |          | STAT1        |
|          |          | POU2F1       |
|          |          | SP1          |
|          |          | JUN          |
|          |          | GATA2        |
|          |          | LEF1         |
|          |          | RELA         |
|          |          | ELK1         |

**Figure S9: A list of transcription factors that potentially bind to DR4 and/or DR5 promoters**

The promoter sequences, that are 2000 bases upstream of the coding region, were put into an online tool, Human Core-Promoter Finder (<http://rulai.cshl.org/tools/genefinder/CPROMOTER/human.htm>), to find transcription factors predicted to bind DR4 and/or DR5.

# Supporting Information Figure S10

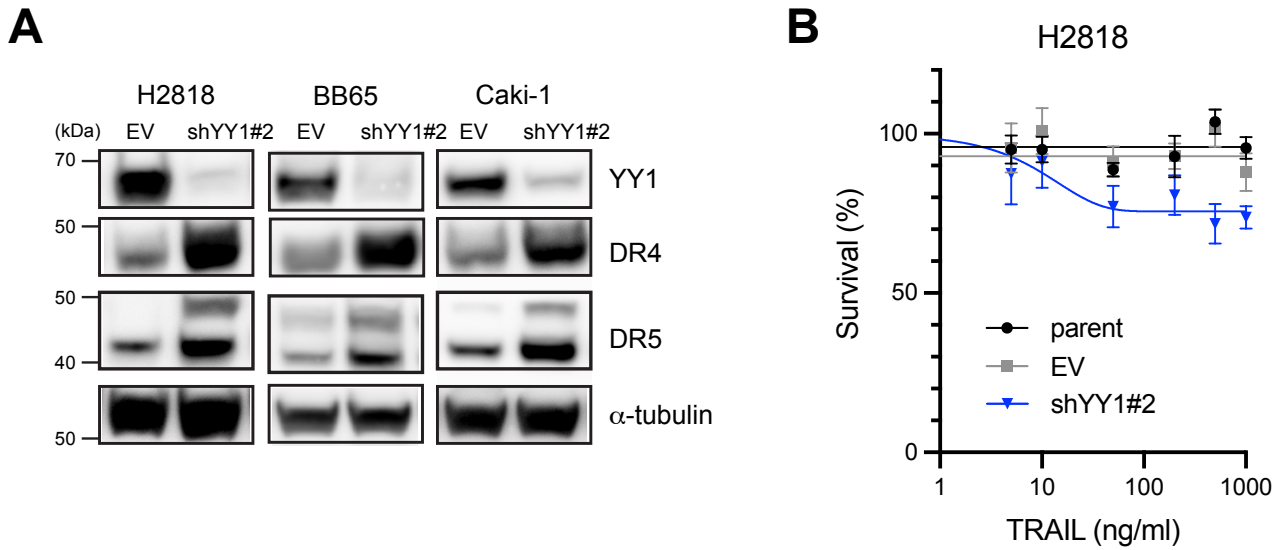

**Figure S10: YY1 knockdown increases death receptors expression and TRAIL sensitivity in BAP1-wild-type-cancer cells**

**A**, Immunoblots of YY1, DR4 and DR5 in BAP1-wild-type MPM cells (H2818) and in BAP1-wild-type- clear cell renal cell carcinoma (CCRCC) cells (BB65 and Caki-1) transduced with YY1 (shYY1-clone#2) or empty vector (EV) shRNA. **B**, Cell viability assay of parental, EV- or shYY1(clone#2) - transduced H2818 cells following treatment with a dose range of rTRAIL (0-1000ng/ml) for 72 hours.

# Supporting Information Figure S11

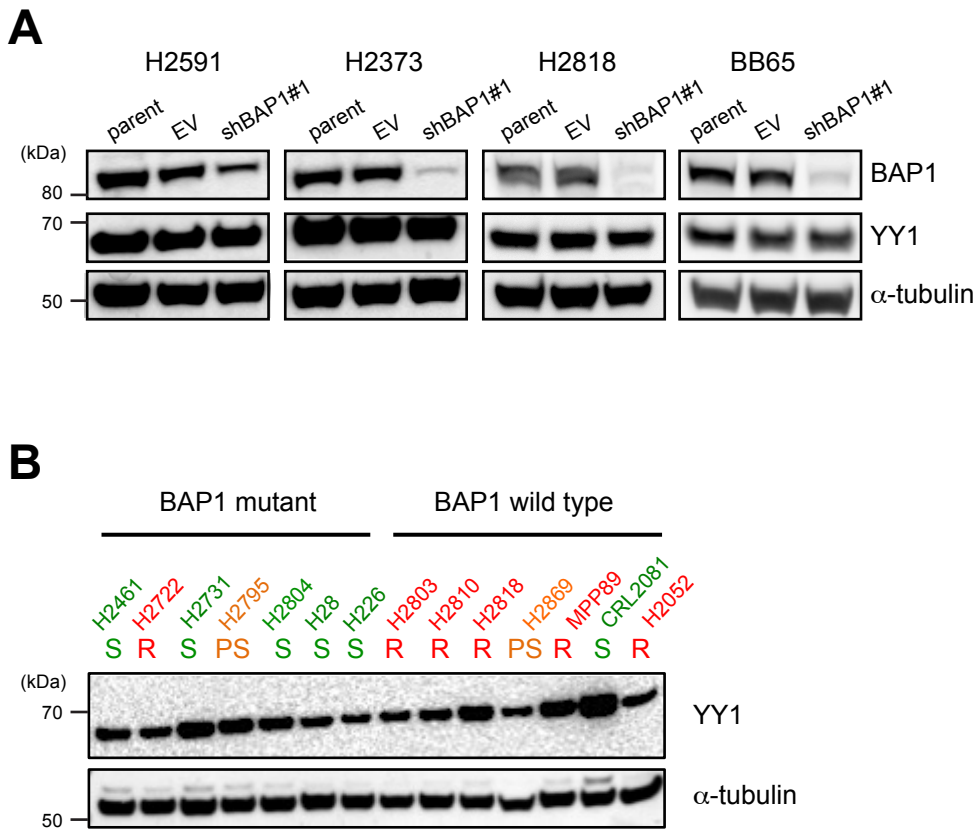

## Figure S11: YY1 expression is not regulated by BAP1

**A**, Immunoblot analysis in parental, BAP1 shRNA (shBAP1 clone#1) or empty vector shRNA (EV) -transduced H2591, H2373, H2818 and BB65 cells. **B**, Immunoblot of YY1 expression in BAP1 mutant (n=7) vs BAP1 wild-type (n=7) MPM cells. Sensitivity to rTRAIL treatment is indicated as font colour: green sensitive (S); orange partially sensitive (PS); red resistant (R).

## Supporting Information Figure S12

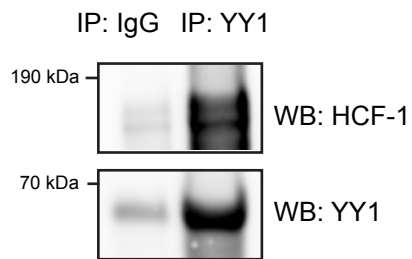

### Figure S12: Interaction of YY1 and HCF-1

Co-Immunoprecipitation (Co-IP) of endogenous YY1 and HCF-1 in BAP1-wild type CCRCC (Caki-1) cells. Normal rabbit control IgG was used to show the specific interaction with the antibody.
